# Supplementary material for: Effects of Global Warming on Patients with Dementia, Motor Neuron or Parkinson’s Diseases: A Comparison among Cortical and Subcortical Disorders
Source: MDPI journal article supplement (doi:10.3390/ijerph192013429), 2022-10-18
Supplement: s1 [file s1]

## Supplementary information - Appendix A: climate change and epidemiological data

**Table S1 – Countries climate and epidemiological indices**

|    |                     | WI 1990-2016 | T2016  | PD     |       |        | AD/D   |        |        | ALS/MND |        |        |
|----|---------------------|--------------|--------|--------|-------|--------|--------|--------|--------|---------|--------|--------|
|    |                     |              |        | DEATHS | PREV  | DALY'S | DEATHS | PREV   | DALY'S | DEATHS  | PREV   | DALY'S |
| 1  | Afghanistan         | 0.052        | 14.392 | 0.375  | 0.270 | 0.362  | 0.071  | -0.015 | 0.051  | 0.318   | 0.032  | 0.227  |
| 2  | Albania             | 0.055        | 12.533 | 0.109  | 0.140 | 0.124  | -0.034 | -0.016 | -0.030 | -0.072  | 0.068  | -0.150 |
| 3  | Algeria             | 0.035        | 23.650 | 0.424  | 0.380 | 0.424  | -0.018 | -0.043 | -0.024 | 0.069   | 0.029  | -0.086 |
| 4  | Andorra             | 0.034        | 9.600  | 0.159  | 0.121 | 0.141  | -0.032 | -0.049 | -0.044 | 0.132   | 0.210  | -0.004 |
| 5  | Angola              | -0.003       | 22.042 | 0.502  | 0.197 | 0.418  | 0.237  | -0.031 | 0.154  | 0.186   | 0.050  | 0.093  |
| 6  | Antigua Barbuda     | 0.018        | 26.925 | 0.145  | 0.123 | 0.133  | 0.006  | -0.016 | -0.005 | -0.057  | 0.049  | -0.047 |
| 7  | Argentina           | 0.010        | 14.450 | 0.010  | 0.025 | 0.018  | -0.027 | -0.040 | -0.036 | 0.292   | 0.278  | 0.220  |
| 8  | Armenia             | 0.063        | 7.142  | 0.135  | 0.107 | 0.131  | 0.036  | -0.005 | 0.020  | 0.058   | 0.037  | -0.028 |
| 9  | Australia           | 0.009        | 22.300 | 0.155  | 0.082 | 0.101  | -0.060 | -0.092 | -0.083 | 0.219   | 0.303  | 0.127  |
| 10 | Austria             | 0.043        | 7.592  | 0.151  | 0.142 | 0.146  | -0.057 | -0.039 | -0.058 | 0.368   | 0.369  | 0.172  |
| 11 | Azerbaijan          | 0.063        | 12.917 | 0.151  | 0.119 | 0.138  | 0.019  | 0.004  | 0.010  | 0.357   | 0.052  | 0.242  |
| 12 | Bahrain             | 0.063        | 28.983 | 0.264  | 0.290 | 0.259  | -0.011 | -0.021 | -0.034 | -0.076  | 0.041  | -0.105 |
| 13 | Bangladesesh        | 0.021        | 25.725 | -0.102 | 0.250 | -0.038 | -0.259 | -0.006 | -0.226 | -0.256  | 0.086  | -0.296 |
| 14 | Barbados            | 0.017        | 27.042 | 0.186  | 0.113 | 0.162  | 0.057  | -0.020 | 0.027  | 0.127   | 0.043  | 0.120  |
| 15 | Belarus             | 0.046        | 7.917  | 0.108  | 0.090 | 0.108  | 0.013  | -0.012 | 0.004  | 0.293   | 0.054  | 0.177  |
| 16 | Belgium             | 0.029        | 10.767 | 0.155  | 0.124 | 0.136  | -0.073 | -0.092 | -0.088 | 0.248   | 0.372  | 0.109  |
| 17 | Belize              | 0.028        | 26.200 | 0.304  | 0.201 | 0.289  | 0.046  | -0.039 | 0.027  | 1.366   | 0.098  | 0.891  |
| 18 | Benin               | 0.031        | 28.433 | 0.156  | 0.141 | 0.162  | -0.045 | -0.071 | -0.050 | 0.229   | 0.034  | 0.083  |
| 19 | Bolivia             | -0.006       | 21.067 | 0.211  | 0.141 | 0.192  | 0.029  | -0.035 | 0.005  | 0.241   | 0.076  | 0.114  |
| 20 | Bosnia Herzegovina  | 0.057        | 10.583 | 0.160  | 0.195 | 0.180  | -0.022 | -0.005 | -0.021 | 0.225   | 0.101  | 0.166  |
| 21 | Botswana            | 0.021        | 22.800 | 0.263  | 0.220 | 0.253  | 0.022  | -0.032 | -0.005 | 0.425   | 0.066  | 0.418  |
| 22 | Brazil              | 0.030        | 25.892 | 0.150  | 0.164 | 0.150  | 0.001  | 0.052  | 0.032  | 0.773   | 0.203  | 0.562  |
| 23 | Brunei              | 0.011        | 27.142 | 0.179  | 0.125 | 0.170  | 0.027  | -0.041 | 0.008  | 0.073   | 0.162  | 0.073  |
| 24 | Bulgaria            | 0.066        | 11.908 | -0.053 | 0.008 | -0.023 | -0.014 | -0.006 | -0.017 | -0.285  | -0.045 | -0.409 |
| 25 | Burkina Faso        | 0.023        | 29.125 | 0.116  | 0.144 | 0.113  | -0.036 | -0.039 | -0.052 | 0.238   | 0.051  | 0.172  |
| 26 | Burundi             | 0.010        | 20.842 | 0.254  | 0.159 | 0.230  | 0.042  | -0.044 | 0.009  | -0.209  | 0.007  | -0.235 |
| 27 | Cambodia            | 0.004        | 28.050 | 0.576  | 0.266 | 0.469  | 0.178  | -0.039 | 0.114  | 0.367   | 0.106  | 0.206  |
| 28 | Cameroon            | 0.016        | 25.275 | 0.155  | 0.116 | 0.153  | -0.002 | -0.042 | -0.014 | 0.400   | 0.015  | 0.378  |
| 29 | Canada              | 0.060        | -5.442 | 0.454  | 0.430 | 0.445  | -0.014 | -0.059 | -0.046 | 0.202   | 0.421  | 0.127  |
| 30 | Cape Verde          | 0.020        | 23.358 | 0.316  | 0.245 | 0.303  | 0.044  | -0.038 | 0.017  | 0.718   | 0.082  | 0.531  |
| 31 | Central African Rep | 0.023        | 25.550 | 0.109  | 0.080 | 0.105  | 0.029  | 0.034  | 0.042  | 0.053   | -0.006 | -0.002 |
| 32 | Chad                | 0.032        | 27.692 | 0.113  | 0.120 | 0.113  | -0.042 | -0.040 | -0.048 | 0.117   | 0.052  | 0.107  |
| 33 | Chile               | 0.009        | 9.075  | 0.165  | 0.199 | 0.175  | -0.053 | -0.059 | -0.072 | 0.047   | 0.276  | 0.002  |
| 34 | China               | 0.034        | 7.442  | 0.827  | 1.157 | 1.040  | -0.001 | 0.056  | 0.005  | -0.011  | 0.186  | -0.121 |
| 35 | Colombia            | 0.018        | 25.483 | 0.120  | 0.155 | 0.134  | -0.073 | -0.049 | -0.068 | 0.679   | 0.124  | 0.417  |
| 36 | Comoros             | 0.016        | 24.617 | 0.310  | 0.230 | 0.291  | 0.040  | -0.041 | 0.013  | -0.038  | -0.001 | -0.112 |
| 37 | Costa Rica          | 0.006        | 25.158 | 0.128  | 0.153 | 0.140  | -0.060 | -0.042 | -0.058 | 0.476   | 0.172  | 0.486  |

|    |                |       |         |        |        |        |        |        |        |        |        |        |
|----|----------------|-------|---------|--------|--------|--------|--------|--------|--------|--------|--------|--------|
| 38 | Cote d'Ivoire  | 0.018 | 27.267  | 0.208  | 0.137  | 0.204  | 0.031  | -0.031 | 0.022  | 0.242  | 0.014  | 0.204  |
| 39 | Croatia        | 0.052 | 11.992  | 0.079  | 0.079  | 0.086  | -0.003 | -0.013 | -0.009 | 0.121  | -0.040 | -0.069 |
| 40 | Cuba           | 0.010 | 26.175  | 0.079  | 0.090  | 0.090  | -0.032 | -0.048 | -0.043 | -0.026 | 0.027  | -0.111 |
| 41 | Cyprus         | 0.071 | 20.308  | 0.049  | 0.163  | 0.060  | -0.081 | -0.017 | -0.090 | -0.154 | 0.197  | -0.274 |
| 42 | Czech Republic | 0.047 | 9.192   | 0.076  | 0.093  | 0.075  | -0.026 | -0.014 | -0.033 | 0.005  | -0.008 | -0.161 |
| 43 | Demo Rep Congo | 0.010 | 24.558  | 0.236  | 0.067  | 0.215  | 0.048  | -0.034 | 0.033  | -0.045 | -0.011 | -0.145 |
| 44 | Denmark        | 0.034 | 9.008   | 0.567  | 0.459  | 0.513  | -0.123 | -0.201 | -0.171 | -0.154 | 0.208  | -0.194 |
| 45 | Djibouti       | 0.039 | 28.967  | 0.382  | 0.273  | 0.356  | 0.064  | -0.041 | 0.033  | 0.236  | -0.001 | 0.025  |
| 46 | Dominica       | 0.020 | 22.792  | 0.172  | 0.155  | 0.165  | 0.007  | -0.035 | -0.018 | 0.504  | 0.138  | 0.519  |
| 47 | Dominican Rep  | 0.004 | 24.567  | 0.138  | 0.175  | 0.146  | -0.076 | -0.062 | -0.080 | 0.137  | 0.085  | 0.003  |
| 48 | Ecuador        | 0.003 | 22.192  | 0.108  | 0.136  | 0.112  | -0.063 | -0.051 | -0.070 | 0.606  | 0.076  | 0.435  |
| 49 | Egypt          | 0.057 | 23.692  | 0.402  | 0.407  | 0.410  | -0.015 | 0.009  | -0.008 | 0.296  | 0.071  | 0.074  |
| 50 | El Salvador    | 0.019 | 25.758  | 0.138  | 0.186  | 0.137  | -0.063 | -0.037 | -0.070 | 0.199  | 0.077  | 0.119  |
| 51 | Eq Guinea      | 0.017 | 24.942  | 0.583  | 0.423  | 0.524  | 0.118  | -0.044 | 0.040  | 0.003  | 0.246  | -0.149 |
| 52 | Eritrea        | 0.049 | 27.583  | 0.437  | 0.269  | 0.397  | 0.094  | -0.055 | 0.044  | 0.172  | 0.038  | 0.104  |
| 53 | Estonia        | 0.040 | 6.492   | 0.056  | 0.015  | 0.032  | -0.002 | -0.016 | -0.011 | 0.001  | 0.027  | -0.125 |
| 54 | Ethiopia       | 0.032 | 23.600  | 0.407  | 0.249  | 0.369  | 0.093  | -0.041 | 0.060  | -0.085 | 0.039  | -0.185 |
| 55 | Fiji           | 0.012 | 24.592  | 0.054  | 0.147  | 0.075  | -0.072 | -0.007 | -0.063 | 0.335  | 0.070  | 0.313  |
| 56 | Finland        | 0.053 | 3.117   | 0.157  | 0.058  | 0.103  | -0.023 | -0.074 | -0.050 | -0.238 | 0.195  | -0.242 |
| 57 | France         | 0.028 | 11.792  | -0.051 | -0.022 | -0.049 | -0.006 | 0.011  | -0.017 | 0.050  | 0.273  | -0.061 |
| 58 | Gabon          | 0.019 | 25.833  | 0.283  | 0.181  | 0.258  | 0.100  | -0.020 | 0.066  | 0.101  | 0.002  | 0.034  |
| 59 | Georgia        | 0.064 | 7.842   | 0.086  | 0.052  | 0.083  | 0.022  | 0.002  | 0.017  | -0.064 | 0.017  | -0.063 |
| 60 | Germany        | 0.034 | 9.917   | 0.145  | 0.115  | 0.126  | -0.208 | -0.177 | -0.184 | 0.013  | 0.275  | -0.099 |
| 61 | Ghana          | 0.024 | 28.225  | 0.284  | 0.135  | 0.265  | 0.120  | -0.030 | 0.087  | 0.536  | 0.062  | 0.428  |
| 62 | Greece         | 0.055 | 14.842  | 0.116  | 0.132  | 0.115  | -0.054 | -0.037 | -0.054 | 1.563  | 0.294  | 1.149  |
| 63 | Greenland      | 0.068 | -15.875 | 0.128  | 0.127  | 0.130  | -0.020 | -0.040 | -0.041 | 0.033  | 0.298  | -0.014 |
| 64 | Grenada        | 0.023 | 27.575  | 0.293  | 0.227  | 0.283  | 0.051  | -0.027 | 0.028  | 0.729  | 0.136  | 0.645  |
| 65 | Guatemala      | 0.026 | 24.283  | 0.157  | 0.180  | 0.157  | -0.026 | -0.026 | -0.038 | 0.266  | 0.057  | 0.194  |
| 66 | Guine-Bissau   | 0.020 | 27.833  | 0.162  | 0.131  | 0.155  | -0.022 | -0.044 | -0.034 | 0.182  | 0.020  | 0.098  |
| 67 | Guinea         | 0.020 | 26.583  | 0.179  | 0.110  | 0.175  | 0.015  | -0.044 | 0.002  | 0.298  | 0.009  | 0.118  |
| 68 | Guyana         | 0.023 | 26.475  | 0.168  | 0.151  | 0.160  | 0.025  | -0.016 | 0.001  | -0.015 | 0.090  | -0.085 |
| 69 | Haiti          | 0.004 | 25.533  | 0.217  | 0.145  | 0.207  | 0.017  | -0.063 | -0.007 | 0.166  | 0.028  | -0.017 |
| 70 | Honduras       | 0.018 | 24.475  | 0.198  | 0.184  | 0.187  | -0.020 | -0.043 | -0.036 | 0.432  | 0.063  | 0.255  |
| 71 | Hungary        | 0.058 | 11.483  | 0.083  | 0.095  | 0.090  | -0.010 | -0.016 | -0.014 | 0.003  | -0.002 | 0.019  |
| 72 | Iceland        | 0.048 | 3.133   | 0.204  | 0.134  | 0.174  | -0.001 | -0.065 | -0.029 | 0.237  | 0.251  | 0.128  |
| 73 | India          | 0.025 | 25.133  | 0.558  | 0.297  | 0.496  | 0.234  | -0.055 | 0.135  | 0.569  | 0.161  | 0.440  |
| 74 | Indonesia      | 0.010 | 26.417  | 0.551  | 0.217  | 0.434  | 0.326  | -0.001 | 0.206  | 0.431  | 0.106  | 0.170  |
| 75 | Iran           | 0.058 | 18.558  | 0.612  | 0.587  | 0.625  | 0.037  | -0.012 | 0.024  | 0.849  | 0.073  | 0.586  |
| 76 | Iraq           | 0.054 | 22.958  | 0.233  | 0.227  | 0.235  | -0.016 | -0.014 | -0.018 | 0.253  | 0.036  | 0.171  |
| 77 | ireland        | 0.004 | 9.700   | 0.180  | -0.041 | 0.164  | -0.050 | -0.049 | -0.060 | 0.247  | 0.376  | 0.179  |
| 78 | Israel         | 0.064 | 21.192  | -0.048 | -0.041 | -0.056 | -0.052 | -0.039 | -0.061 | -0.232 | 0.174  | -0.296 |
| 79 | Italy          | 0.044 | 13.217  | -0.055 | -0.034 | -0.046 | -0.018 | -0.029 | -0.044 | 0.358  | 0.345  | 0.090  |
| 80 | Jamaica        | 0.006 | 25.333  | 0.208  | 0.137  | 0.196  | 0.015  | -0.043 | 0.001  | 0.455  | 0.058  | 0.317  |
| 81 | Japan          | 0.030 | 11.600  | 0.102  | 0.213  | 0.157  | 0.102  | 0.178  | 0.105  | -0.025 | 0.199  | -0.119 |

|     |                          |        |        |        |        |        |        |        |        |        |        |        |
|-----|--------------------------|--------|--------|--------|--------|--------|--------|--------|--------|--------|--------|--------|
| 82  | Jordan                   | 0.065  | 20.017 | 0.271  | 0.287  | 0.260  | -0.038 | -0.008 | -0.035 | 0.392  | 0.045  | 0.423  |
| 83  | Kazakhstan               | 0.051  | 7.608  | 0.055  | 0.090  | 0.063  | -0.042 | -0.008 | -0.039 | -0.022 | 0.040  | -0.060 |
| 84  | Kenya                    | 0.022  | 25.575 | 0.409  | 0.220  | 0.364  | 0.153  | -0.021 | 0.096  | 0.442  | 0.031  | 0.250  |
| 85  | Kiribati                 | -0.001 | 27.492 | 0.283  | 0.159  | 0.256  | 0.138  | -0.012 | 0.091  | 0.464  | 0.047  | 0.460  |
| 86  | Kuwait                   | 0.059  | 26.892 | 0.428  | 0.357  | 0.405  | 0.001  | -0.025 | -0.006 | -0.210 | -0.003 | -0.293 |
| 87  | Kyrgystan                | 0.055  | 3.000  | 0.067  | 0.052  | 0.069  | -0.002 | -0.002 | 0.002  | 0.032  | -0.001 | 0.018  |
| 88  | Laos                     | 0.012  | 24.217 | 0.430  | 0.260  | 0.428  | 0.155  | -0.015 | 0.102  | 0.249  | 0.111  | 0.101  |
| 89  | Latvia                   | 0.035  | 7.100  | 0.077  | 0.076  | 0.080  | 0.000  | -0.005 | -0.004 | 1.143  | 0.070  | 0.852  |
| 90  | Lebanon                  | 0.067  | 16.550 | 0.197  | 0.339  | 0.208  | -0.125 | -0.030 | -0.126 | -0.277 | 0.032  | -0.324 |
| 91  | Lesotho                  | 0.026  | 13.417 | 0.172  | 0.180  | 0.168  | 0.007  | -0.017 | -0.009 | 1.088  | 0.065  | 1.062  |
| 92  | Liberia                  | 0.015  | 26.175 | 0.176  | 0.106  | 0.171  | 0.039  | -0.035 | 0.023  | 0.056  | 0.004  | -0.101 |
| 93  | Lithuania                | 0.035  | 7.767  | 0.092  | 0.088  | 0.096  | 0.006  | -0.008 | 0.001  | 1.338  | 0.213  | 1.053  |
| 94  | Luxembourg               | 0.031  | 10.108 | 0.181  | 0.134  | 0.160  | -0.066 | -0.109 | -0.097 | 0.044  | 0.272  | -0.075 |
| 95  | Macedonia                | 0.056  | 11.200 | 0.059  | 0.077  | 0.068  | 0.012  | 0.003  | 0.007  | -0.520 | 0.058  | -0.701 |
| 96  | Madagascar               | 0.020  | 22.825 | 0.172  | 0.141  | 0.159  | -0.014 | -0.031 | -0.012 | -0.046 | 0.004  | -0.122 |
| 97  | Malawi                   | 0.013  | 22.692 | 0.283  | 0.190  | 0.269  | 0.043  | -0.034 | 0.019  | 0.152  | 0.021  | -0.098 |
| 98  | Malaysia                 | 0.013  | 26.308 | 0.199  | 0.264  | 0.191  | -0.076 | -0.009 | -0.068 | 0.238  | 0.086  | 0.178  |
| 99  | Maldives                 | -0.010 | 27.800 | 0.258  | 0.251  | 0.258  | 0.012  | 0.005  | 0.012  | -0.244 | 0.087  | -0.347 |
| 100 | Mali                     | 0.021  | 29.142 | 0.231  | 0.132  | 0.200  | 0.046  | -0.037 | 0.014  | -0.057 | 0.062  | -0.130 |
| 101 | Malta                    | 0.050  | 20.250 | 0.153  | 0.154  | 0.154  | -0.040 | -0.045 | -0.050 | 0.145  | 0.323  | 0.155  |
| 102 | Marshall Islands         | 0.026  | 28.425 | -0.047 | 0.133  | -0.019 | -0.159 | -0.017 | -0.138 | 0.009  | 0.047  | 0.011  |
| 103 | Mauritania               | 0.027  | 28.625 | 0.205  | 0.157  | 0.189  | 0.030  | -0.030 | 0.004  | -0.061 | 0.033  | -0.039 |
| 104 | Mauritius                | 0.040  | 24.017 | 0.198  | 0.215  | 0.181  | -0.060 | -0.031 | -0.065 | 0.027  | 0.086  | -0.035 |
| 105 | Mexico                   | 0.023  | 21.758 | 0.144  | 0.177  | 0.164  | -0.062 | -0.039 | -0.055 | 0.642  | 0.098  | 0.387  |
| 106 | Moldova                  | 0.064  | 11.233 | 0.059  | 0.065  | 0.069  | -0.035 | -0.016 | -0.021 | 0.169  | 0.011  | 0.159  |
| 107 | Mongolia                 | 0.028  | 0.633  | 0.052  | 0.112  | 0.059  | -0.018 | -0.002 | -0.033 | 0.384  | 0.068  | 0.212  |
| 108 | Montenegro               | 0.059  | 9.642  | 0.109  | 0.084  | 0.103  | 0.014  | 0.004  | 0.013  | 0.030  | 0.041  | -0.053 |
| 109 | Morocco                  | 0.046  | 18.642 | 0.573  | 0.573  | 0.542  | 0.076  | -0.043 | 0.045  | 0.425  | 0.051  | 0.216  |
| 110 | Mozambique               | 0.016  | 24.600 | 0.210  | 0.207  | 0.207  | -0.026 | -0.040 | -0.041 | -0.004 | 0.071  | -0.123 |
| 111 | Myanmar                  | 0.018  | 23.683 | 0.457  | 0.294  | 0.412  | 0.088  | -0.031 | -0.065 | 0.267  | 0.133  | 0.176  |
| 112 | Namibia                  | 0.020  | 21.042 | 0.257  | 0.202  | 0.236  | 0.022  | -0.034 | -0.007 | 0.107  | 0.048  | 0.090  |
| 113 | Nepal                    | 0.039  | 13.850 | 0.667  | 0.295  | 0.545  | 0.270  | -0.054 | 0.148  | 0.458  | 0.081  | 0.254  |
| 114 | Netherlands              | 0.032  | 10.583 | -0.060 | -0.075 | -0.670 | -0.142 | -0.168 | -0.159 | 0.078  | 0.281  | -0.014 |
| 115 | New Zeland               | 0.018  | 10.742 | 0.185  | 0.136  | 0.149  | -0.070 | -0.084 | -0.076 | 0.108  | 0.251  | 0.035  |
| 116 | Nicaragua                | 0.010  | 25.642 | 0.138  | 0.159  | 0.148  | -0.050 | -0.039 | -0.048 | 0.336  | 0.042  | 0.202  |
| 117 | Niger                    | 0.036  | 28.333 | 0.140  | 0.080  | 0.131  | 0.019  | -0.028 | 0.009  | -0.050 | 0.018  | -0.195 |
| 118 | Nigeria                  | 0.026  | 27.725 | 0.278  | 0.198  | 0.265  | 0.060  | -0.009 | 0.038  | 0.043  | 0.060  | -0.018 |
| 119 | North Korea              | 0.021  | 6.592  | 0.151  | 0.060  | 0.144  | 0.034  | -0.038 | 0.025  | 0.146  | 0.026  | 0.126  |
| 120 | Northern Mariana Islands | 0.021  | 28.317 | 0.081  | 0.140  | 0.095  | -0.043 | -0.019 | -0.051 | 0.439  | 0.055  | 0.304  |
| 121 | Norway                   | 0.037  | 2.233  | 0.930  | 0.871  | 0.939  | -0.072 | -0.097 | -0.093 | 0.019  | 0.280  | -0.084 |
| 122 | Oman                     | 0.036  | 26.383 | 0.634  | 0.743  | 0.679  | -0.075 | -0.049 | -0.087 | 0.751  | 0.072  | 0.433  |
| 123 | Pakistan                 | 0.047  | 21.550 | 0.438  | 0.279  | 0.395  | 0.107  | -0.043 | 0.058  | 0.664  | 0.070  | 0.485  |
| 124 | Panama                   | 0.009  | 25.867 | 0.114  | 0.143  | 0.122  | -0.082 | -0.066 | -0.083 | 0.098  | 0.094  | 0.094  |
| 125 | Papua                    | -0.003 | 25.133 | 0.189  | 0.157  | 0.169  | 0.016  | -0.022 | -0.007 | -0.013 | 0.069  | -0.026 |

|     |                              |        |        |       |       |       |        |        |        |        |        |        |
|-----|------------------------------|--------|--------|-------|-------|-------|--------|--------|--------|--------|--------|--------|
| 126 | Paraguay                     | 0.013  | 23.325 | 0.234 | 0.194 | 0.231 | -0.020 | -0.061 | -0.033 | 2.154  | 0.108  | 1.776  |
| 127 | Peru                         | 0.005  | 20.225 | 0.159 | 0.123 | 0.152 | -0.040 | -0.075 | -0.051 | -0.175 | 0.056  | -0.242 |
| 128 | Philippines                  | 0.010  | 26.342 | 0.170 | 0.169 | 0.176 | 0.013  | -0.008 | 0.006  | 0.170  | 0.067  | 0.025  |
| 129 | Poland                       | 0.045  | 9.367  | 0.137 | 0.142 | 0.140 | -0.066 | -0.088 | -0.087 | 0.029  | 0.065  | -0.087 |
| 130 | Portugal                     | 0.027  | 15.900 | 0.343 | 0.319 | 0.329 | -0.042 | -0.043 | -0.049 | 0.957  | 0.376  | 0.482  |
| 131 | Puerto Rico                  | 0.016  | 25.283 | 0.141 | 0.122 | 0.135 | 0.013  | -0.029 | -0.008 | 0.162  | 0.080  | 0.057  |
| 132 | Qatar                        | 0.062  | 28.692 | 0.325 | 0.340 | 0.337 | -0.042 | -0.027 | -0.048 | -0.039 | 0.044  | -0.100 |
| 133 | Romania                      | 0.067  | 10.358 | 0.081 | 0.102 | 0.092 | -0.013 | -0.009 | -0.015 | 0.244  | 0.064  | 0.085  |
| 134 | Russia                       | 0.060  | -4.375 | 0.090 | 0.071 | 0.090 | 0.000  | -0.010 | -0.003 | 0.399  | 0.027  | 0.253  |
| 135 | Rwanda                       | 0.014  | 19.533 | 0.525 | 0.246 | 0.458 | 0.162  | -0.041 | 0.110  | 0.062  | 0.029  | -0.022 |
| 136 | Saint Lucia                  | 0.020  | 26.642 | 0.213 | 0.180 | 0.208 | 0.012  | -0.021 | 0.001  | 0.615  | 0.148  | 0.508  |
| 137 | Saint Vincent and Grenadines | 0.022  | 27.733 | 0.171 | 0.186 | 0.179 | -0.058 | -0.046 | -0.056 | 1.762  | 0.131  | 1.310  |
| 138 | Samoa                        | 0.011  | 27.867 | 0.085 | 0.132 | 0.091 | -0.044 | -0.017 | -0.044 | -0.076 | 0.058  | -0.066 |
| 139 | Sao Tome                     | 0.016  | 23.458 | 0.222 | 0.138 | 0.195 | 0.032  | -0.035 | 0.014  | 0.268  | 0.028  | 0.093  |
| 140 | Saudi Arabia                 | 0.052  | 25.917 | 0.657 | 0.651 | 0.675 | 0.038  | -0.002 | 0.025  | 0.881  | 0.071  | 0.482  |
| 141 | Senegal                      | 0.021  | 29.042 | 0.248 | 0.112 | 0.222 | 0.064  | -0.060 | 0.035  | 0.168  | 0.021  | 0.084  |
| 142 | Serbia                       | 0.063  | 11.642 | 0.087 | 0.076 | 0.089 | 0.018  | -0.004 | 0.008  | 0.225  | 0.039  | 0.089  |
| 143 | Seychelles                   | 0.027  | 27.892 | 0.160 | 0.190 | 0.151 | -0.024 | -0.011 | -0.030 | 0.006  | 0.075  | -0.038 |
| 144 | Sierra Leone                 | 0.018  | 26.975 | 0.154 | 0.127 | 0.156 | -0.003 | -0.036 | -0.007 | 0.136  | 0.028  | -0.020 |
| 145 | Singapore                    | 0.019  | 28.092 | 0.113 | 0.162 | 0.127 | 0.032  | 0.115  | 0.063  | 0.099  | 0.206  | -0.012 |
| 146 | Slovakia                     | 0.054  | 8.758  | 0.080 | 0.097 | 0.086 | -0.006 | -0.013 | -0.014 | 0.425  | 0.061  | 0.250  |
| 147 | Slovenia                     | 0.047  | 9.900  | 0.067 | 0.097 | 0.074 | -0.046 | -0.024 | -0.051 | -0.792 | -0.201 | -0.824 |
| 148 | Solomon Islands              | -0.006 | 25.575 | 0.127 | 0.129 | 0.132 | 0.034  | -0.005 | 0.012  | 0.066  | 0.054  | 0.095  |
| 149 | Somalia                      | 0.015  | 27.475 | 0.195 | 0.138 | 0.178 | -0.004 | -0.052 | -0.017 | -0.056 | 0.001  | -0.161 |
| 150 | South Africa                 | 0.027  | 19.033 | 0.213 | 0.142 | 0.199 | 0.064  | -0.031 | 0.034  | 0.293  | 0.059  | 0.198  |
| 151 | South Korea                  | 0.024  | 12.058 | 0.246 | 0.210 | 0.214 | -0.026 | -0.042 | -0.045 | -0.339 | 0.263  | -0.347 |
| 152 | South Sudan                  | 0.033  | 27.950 | 0.342 | 0.159 | 0.305 | 0.102  | -0.049 | 0.070  | -0.015 | 0.006  | -0.165 |
| 153 | Spain                        | 0.031  | 14.283 | 0.060 | 0.080 | 0.049 | -0.096 | -0.127 | -0.124 | 0.411  | 0.367  | 0.121  |
| 154 | Sri Lanka                    | 0.017  | 27.758 | 0.082 | 0.205 | 0.119 | -0.104 | -0.001 | -0.074 | 0.216  | 0.096  | -0.002 |
| 155 | Sudan                        | 0.049  | 28.275 | 0.532 | 0.382 | 0.504 | 0.081  | -0.028 | 0.050  | 0.340  | 0.069  | 0.216  |
| 156 | Suriname                     | 0.021  | 26.417 | 0.201 | 0.140 | 0.178 | 0.073  | -0.016 | 0.036  | 0.558  | 0.100  | 0.395  |
| 157 | Sweden                       | 0.034  | 2.925  | 0.183 | 0.136 | 0.151 | -0.004 | -0.040 | -0.027 | 0.359  | 0.335  | 0.253  |
| 158 | Switzerland                  | 0.036  | 6.350  | 0.139 | 0.103 | 0.108 | -0.017 | -0.061 | -0.050 | -0.074 | 0.228  | -0.129 |
| 159 | Syria                        | 0.058  | 19.000 | 0.418 | 0.409 | 0.426 | -0.006 | -0.025 | -0.012 | 0.234  | 0.040  | 0.056  |
| 160 | Tajikistan                   | 0.056  | 4.558  | 0.120 | 0.089 | 0.120 | -0.022 | -0.042 | -0.028 | -0.019 | -0.011 | -0.134 |
| 161 | Tanzania                     | 0.011  | 23.125 | 0.352 | 0.240 | 0.315 | -0.002 | -0.059 | -0.016 | 0.114  | 0.040  | -0.034 |
| 162 | Thailand                     | 0.005  | 27.350 | 0.252 | 0.317 | 0.276 | -0.052 | -0.015 | -0.052 | -0.034 | 0.100  | -0.073 |
| 163 | The Bahamas                  | 0.016  | 25.433 | 0.115 | 0.094 | 0.105 | 0.041  | 0.005  | 0.021  | -0.052 | -0.002 | -0.125 |
| 164 | The Gambia                   | 0.019  | 28.333 | 0.182 | 0.096 | 0.204 | 0.044  | -0.037 | 0.026  | 0.051  | 0.013  | -0.010 |
| 165 | Timor-Leste                  | 0.001  | 25.633 | 0.506 | 0.266 | 0.448 | 0.160  | -0.012 | 0.115  | 0.397  | 0.136  | 0.115  |
| 166 | Togo                         | 0.032  | 27.942 | 0.175 | 0.151 | 0.179 | -0.017 | -0.041 | -0.023 | 0.197  | 0.011  | 0.132  |
| 167 | Tonga                        | 0.008  | 25.042 | 0.098 | 0.139 | 0.110 | 0.008  | 0.000  | -0.001 | -0.014 | 0.054  | 0.001  |
| 168 | Trinidad Tobago              | 0.020  | 26.750 | 0.108 | 0.132 | 0.113 | -0.033 | -0.029 | -0.042 | 0.065  | 0.078  | 0.100  |
| 169 | Tunisia                      | 0.047  | 20.867 | 0.400 | 0.449 | 0.430 | -0.019 | -0.023 | -0.023 | 0.156  | 0.051  | -0.031 |

|     |                      |       |        |       |       |       |        |        |        |        |        |        |
|-----|----------------------|-------|--------|-------|-------|-------|--------|--------|--------|--------|--------|--------|
| 170 | Turkey               | 0.067 | 12.133 | 0.256 | 0.338 | 0.278 | -0.072 | 0.025  | -0.041 | -0.189 | -0.015 | -0.361 |
| 171 | Turkmenistan         | 0.048 | 16.808 | 0.142 | 0.183 | 0.162 | -0.046 | -0.023 | -0.043 | 0.239  | 0.057  | 0.118  |
| 172 | Uganda               | 0.023 | 23.475 | 0.296 | 0.239 | 0.286 | 0.024  | -0.042 | -0.002 | 0.173  | 0.059  | 0.068  |
| 173 | UK                   | 0.017 | 9.192  | 0.325 | 0.223 | 0.263 | -0.068 | -0.103 | -0.084 | 0.238  | 0.345  | 0.002  |
| 174 | Ukraine              | 0.064 | 9.742  | 0.069 | 0.057 | 0.071 | -0.013 | -0.016 | -0.013 | 0.185  | 0.018  | 0.140  |
| 175 | United Arab Emirates | 0.052 | 28.133 | 0.486 | 0.414 | 0.505 | 0.019  | -0.043 | 0.002  | 0.670  | 0.017  | 0.498  |
| 176 | Uruguay              | 0.007 | 17.600 | 0.071 | 0.109 | 0.082 | -0.052 | -0.046 | -0.061 | -0.015 | 0.234  | -0.042 |
| 177 | USA                  | 0.042 | 8.958  | 0.224 | 0.095 | 0.150 | 0.116  | -0.005 | -0.038 | 0.279  | 0.034  | 0.143  |
| 178 | Uzbekistan           | 0.053 | 14.308 | 0.140 | 0.153 | 0.155 | -0.013 | -0.009 | -0.013 | 0.372  | 0.040  | 0.259  |
| 179 | Vanuato              | 0.004 | 24.308 | 0.146 | 0.144 | 0.148 | 0.025  | -0.011 | 0.012  | 0.143  | 0.053  | 0.172  |
| 180 | Venezuela            | 0.029 | 26.458 | 0.093 | 0.140 | 0.110 | -0.151 | -0.134 | -0.154 | 0.286  | 0.051  | 0.275  |
| 181 | Vietnam              | 0.011 | 25.025 | 0.299 | 0.252 | 0.270 | 0.018  | -0.026 | -0.004 | 0.283  | 0.114  | 0.140  |
| 182 | Yemen                | 0.018 | 23.742 | 0.609 | 0.456 | 0.581 | 0.057  | -0.045 | 0.029  | 0.401  | 0.051  | 0.208  |
| 183 | Zambia               | 0.004 | 22.567 | 0.338 | 0.204 | 0.331 | 0.062  | -0.025 | 0.047  | 0.542  | 0.033  | 0.150  |
| 184 | Zimbabwe             | 0.016 | 22.183 | 0.559 | 0.085 | 0.470 | 0.401  | -0.025 | 0.312  | 0.382  | -0.014 | 0.332  |

**Table S1** Data analysed in this work. For the 184 countries that have been analysed, it lists the 1990-2016 warming index (column 3), the 2016 annual average temperature (column 4), and the 1990-2016 variations of patients' deaths, prevalence and DALYs for Parkinson's patients (PD; columns 5-6-7), for Alzheimer's Disease and other Dementias (AD/D; columns 8-9-10), and for Amyotrophic Lateral Sclerosis/Motor Neuron Diseases (ALS/MND; column 11-12-13). The temperature values refer to the 2-meter temperature: data have been extracted from the World Bank Climate Change Data Portal (<https://climateknowledgeportal.worldbank.org/download-data>). The PD indices come from Dorsey et al (2018), the AD/D indices from Nichols et al. (2019), and the ALS/MND from Logroscino et al. (2018).

**Table S2 – Clusters' population**

|    | HT-LW               | HT-HT      | LT-LW      | LT-HW              |
|----|---------------------|------------|------------|--------------------|
| 1  | Antigua Barbuda     | Algeria    | Angola     | Afghanistan        |
| 2  | Bangladesh          | Bahrain    | Argentina  | Albania            |
| 3  | Barbados            | Belize     | Australia  | Andorra            |
| 4  | Brunei              | Benin      | Bolivia    | Armenia            |
| 5  | Burkina Faso        | Brazil     | Botswana   | Austria            |
| 6  | Cambodia            | Chad       | Burundi    | Azerbaijan         |
| 7  | Cameroon            | Djibouti   | Chile      | Belarus            |
| 8  | Cape Verde          | Egypt      | Dominica   | Belgium            |
| 9  | Central African Rep | Eritrea    | Ecuador    | Bosnia Herzegovina |
| 10 | Colombia            | Ethiopia   | Ireland    | Bulgaria           |
| 11 | Comoros             | Guatemala  | Madagascar | Canada             |
| 12 | Costa Rica          | Kuwait     | Malawi     | China              |
| 13 | Cote d'Ivoire       | Mauritania | Mexico     | Croatia            |

|    |                              |                      |             |                |
|----|------------------------------|----------------------|-------------|----------------|
| 14 | Cuba                         | Mauritius            | Namibia     | Cyprus         |
| 15 | Demo Rep Congo               | Niger                | New Zeland  | Czech Republic |
| 16 | Dominican Rep                | Nigeria              | North Korea | Denmark        |
| 17 | El Salvador                  | Oman                 | Peru        | Estonia        |
| 18 | Eq Guinea                    | Qatar                | Rwanda      | Finland        |
| 19 | Fiji                         | Saudi Arabia         | South Korea | France         |
| 20 | Gabon                        | Seychelles           | Tanzania    | Georgia        |
| 21 | Ghana                        | South Sudan          | UK          | Germany        |
| 22 | Grenada                      | Sudan                | Uruguay     | Greece         |
| 23 | Guine-Bissau                 | Togo                 | Zambia      | Greenland      |
| 24 | Guinea                       | United Arab Emirates | Zimbabwe    | Hungary        |
| 25 | Guyana                       | Venezuela            |             | Iceland        |
| 26 | Haiti                        |                      |             | Iran           |
| 27 | Honduras                     |                      |             | Iraq           |
| 28 | India                        |                      |             | Israel         |
| 29 | Indonesia                    |                      |             | Italy          |
| 30 | Jamaica                      |                      |             | Japan          |
| 31 | Kenya                        |                      |             | Jordan         |
| 32 | Kiribati                     |                      |             | Kazakhstan     |
| 33 | Laos                         |                      |             | Kyrgystan      |
| 34 | Liberia                      |                      |             | Latvia         |
| 35 | Malaysia                     |                      |             | Lebanon        |
| 36 | Maldives                     |                      |             | Lesotho        |
| 37 | Mali                         |                      |             | Lithuania      |
| 38 | Marshall Islands             |                      |             | Luxembourg     |
| 39 | Mozambique                   |                      |             | Macedonia      |
| 40 | Myanmar                      |                      |             | Malta          |
| 41 | Nicaragua                    |                      |             | Moldova        |
| 42 | Northern Mariana Islands     |                      |             | Mongolia       |
| 43 | Panama                       |                      |             | Montenegro     |
| 44 | Papua                        |                      |             | Morocco        |
| 45 | Paraguay                     |                      |             | Nepal          |
| 46 | Philippines                  |                      |             | Netherlands    |
| 47 | Puerto Rico                  |                      |             | Norway         |
| 48 | Saint Lucia                  |                      |             | Pakistan       |
| 49 | Saint Vincent and Grenadines |                      |             | Poland         |
| 50 | Samoa                        |                      |             | Portugal       |
| 51 | Sao Tome                     |                      |             | Romania        |
| 52 | Senegal                      |                      |             | Russia         |
| 53 | Sierra Leone                 |                      |             | Serbia         |
| 54 | Singapore                    |                      |             | Slovakia       |
| 55 | Solomon Islands              |                      |             | Slovenia       |
| 56 | Somalia                      |                      |             | South Africa   |
| 57 | Sri Lanka                    |                      |             | Spain          |

|    |                 |              |
|----|-----------------|--------------|
| 58 | Suriname        | Sweden       |
| 59 | Thailand        | Switzerland  |
| 60 | The Bahamas     | Syria        |
| 61 | The Gambia      | Tajikistan   |
| 62 | Timor-Leste     | Tunisia      |
| 63 | Tonga           | Turkey       |
| 64 | Trinidad Tobago | Turkmenistan |
| 65 | Uganda          | Ukraine      |
| 66 | Vanuato         | USA          |
| 67 | Vietnam         | Uzbekistan   |
| 68 | Yemen           |              |

**Table S2** list of the names of the countries in the 4 clusters: the high-temperature and high-warming (HT-HW) cluster; the high-temperature and low-warming (HT-LW) cluster; the low-temperature and high-warming (LT-HW) cluster; and the low-temperature and low-warming (LT-LW) cluster.

WBCCDP: World Bank Climate Change Data Portal: link: <https://climateknowledgeportal.worldbank.org/download-data>.

**Table S3**

|          |                       |              |              |              |              |
|----------|-----------------------|--------------|--------------|--------------|--------------|
| <b>A</b> | <i>AD/D Deaths</i>    | <b>HT-HW</b> | <b>HT-LW</b> | <b>LT-HW</b> | <b>LT-LW</b> |
|          | <b>HT-HW</b>          | 100.0%       | 44.8%        | 20.0%        | 55.7%        |
|          | <b>HT-LW</b>          |              | 100.0%       | <b>1.2%</b>  | <b>98.2%</b> |
|          | <b>LT-HW</b>          |              |              | 100.0%       | 7.2%         |
|          | <b>LT-LW</b>          |              |              |              | 100.0%       |
| <b>B</b> | <i>ALS/MND Deaths</i> | <b>HT-HW</b> | <b>HT-LW</b> | <b>LT-HW</b> | <b>LT-LW</b> |
|          | <b>HT-HW</b>          | 100.0%       | 91.9%        | 64.4%        | 50.6%        |
|          | <b>HT-LW</b>          |              | 100.0%       | 44.1%        | 39.8%        |
|          | <b>LT-HW</b>          |              |              | 100.0%       | 82.4%        |
|          | <b>LT-LW</b>          |              |              |              | 100.0%       |
| <b>C</b> | <i>PD Deaths</i>      | <b>HT-HW</b> | <b>HT-LW</b> | <b>LT-HW</b> | <b>LT-LW</b> |
|          | <b>HT-HW</b>          | 100.0%       | <b>0.7%</b>  | <b>0.5%</b>  | 9.7%         |
|          | <b>HT-LW</b>          |              | 100.0%       | 29.3%        | 50.5%        |
|          | <b>LT-HW</b>          |              |              | 100.0%       | 22.4%        |
|          | <b>LT-LW</b>          |              |              |              | 100.0%       |

**Table S3.** Differences between the distributions of deaths indices of the 4 clusters for AD/D, ALS/MND and PD patients. The table reports the p-value of the Student's t-test calculated between the distributions of deaths for the different clusters. Bold values identify the statistically significant correlations with Student's t-test  $p < 0.05$  (5%).

**Table S4**

|          |                      |              |              |              |              |
|----------|----------------------|--------------|--------------|--------------|--------------|
| <b>A</b> | <i>AD/D DALYs</i>    | <b>HT-HW</b> | <b>HT-LW</b> | <b>LT-HW</b> | <b>LT-LW</b> |
|          | <b>HT-HW</b>         | 100.0%       | 57.4%        | 13.4%        | 77.6%        |
|          | <b>HT-LW</b>         |              | 100.0%       | <b>0.9%</b>  | 89.7%        |
|          | <b>LT-HW</b>         |              |              | 100.0%       | 11.2%        |
|          | <b>LT-LW</b>         |              |              |              | 100.0%       |
| <b>B</b> | <i>ALS/MND DALYs</i> | <b>HT-HW</b> | <b>HT-LW</b> | <b>LT-HW</b> | <b>LT-LW</b> |
|          | <b>HT-HW</b>         | 100.0%       | 59.5%        | 67.5%        | 72.5%        |
|          | <b>HT-LW</b>         |              | 100.0%       | 21.6%        | 36.5%        |
|          | <b>LT-HW</b>         |              |              | 100.0%       | 93.1%        |
|          | <b>LT-LW</b>         |              |              |              | 100.0%       |
| <b>C</b> | <i>PD DALYs</i>      | <b>HT-HW</b> | <b>HT-LW</b> | <b>LT-HW</b> | <b>LT-LW</b> |
|          | <b>HT-HW</b>         | 100.0%       | <b>0.2%</b>  | <b>1.0%</b>  | <b>3.2%</b>  |
|          | <b>HT-LW</b>         |              | 100.0%       | 30.2%        | 74.8%        |
|          | <b>LT-HW</b>         |              |              | 100.0%       | 39.6%        |
|          | <b>LT-LW</b>         |              |              |              | 100.0%       |

**Table S4.** Differences between the distributions of DALYs indices of the 4 clusters for AD/D, ALS/MND and PD patients. The table reports the p-value of the Student's t-test calculated between the distributions of DALYs for the different clusters. Bold values identify the statistically significant correlations with Student's t-test  $p < 0.05$  (5%).
